# Supplementary material for: Assessing the Dark Field of Metaproteome
Source: PubMed Central journal article supplement — Anal Chem. 2022 Nov 3;94(45):15648–54. doi: 10.1021/acs.analchem.2c02452 (PMC9670033; doi:10.1021/acs.analchem.2c02452), 2022-11-03
Supplement: ac2c02452_si_001.pdf [file ac2c02452_si_001.pdf]

# Supplementary Information for Assessing the dark field of metaproteome

Haonan Duan<sup>1,2</sup>, Kai Cheng<sup>1,2</sup>, Zhibin Ning<sup>1,2</sup>, Leyuan Li<sup>1,2</sup>, Janice Mayne<sup>1,2</sup>, Zhongzhi Sun<sup>1,2</sup>, Daniel Figeys<sup>1,2</sup> \*.

1. School of Pharmaceutical Sciences, Faculty of Medicine, University of Ottawa, Ottawa, Ontario, Canada.

2. Ottawa Institute of Systems Biology, University of Ottawa, Ottawa, Ontario, Canada

\*Corresponding author, [dfigeys@uottawa.ca](mailto:dfigeys@uottawa.ca)

## Table of Content

**Figure S1** The number of <sup>15</sup>N protein groups found in each sample

**Figure S2** Performance of DDA method on peptide identification and quantification with the cultured protein as background

**Figure S3** Abundance distribution of gut microbiome

**Figure S4** Representative microbiome composition

**Figure S5** Representative microbiome composition (Figure S4); Intersected peptides with LOR at 0.5% between two groups

**Figure S6** R<sup>2</sup> value from robust regression between log<sub>2</sub> intensity of peptides and E. coli percentage and representative linear regression plots

**Figure S7** Evaluation of taxonomy and function analysis

**Figure S8** Bray-Curtis distance between each sample and 100% E. coli on COG composition

**Figure S9** Representative well-fitted linear regression plot from cultured microbiome group when using MBR

**Figure S10** Representative well-fitted linear regression plot from stool microbiome group when using MBR

**Figure S11** The number of quantified peptides by MBR

Figure S1

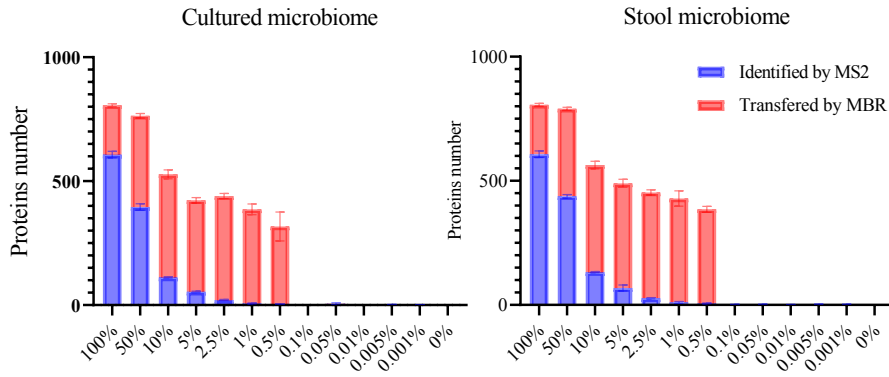

Figure S1. The number of identified  $^{15}\text{N}$  protein groups along *E. coli* concentration with or without match-between-run in cultured microbiome group (a) and stool microbiome group (b).

Figure S2

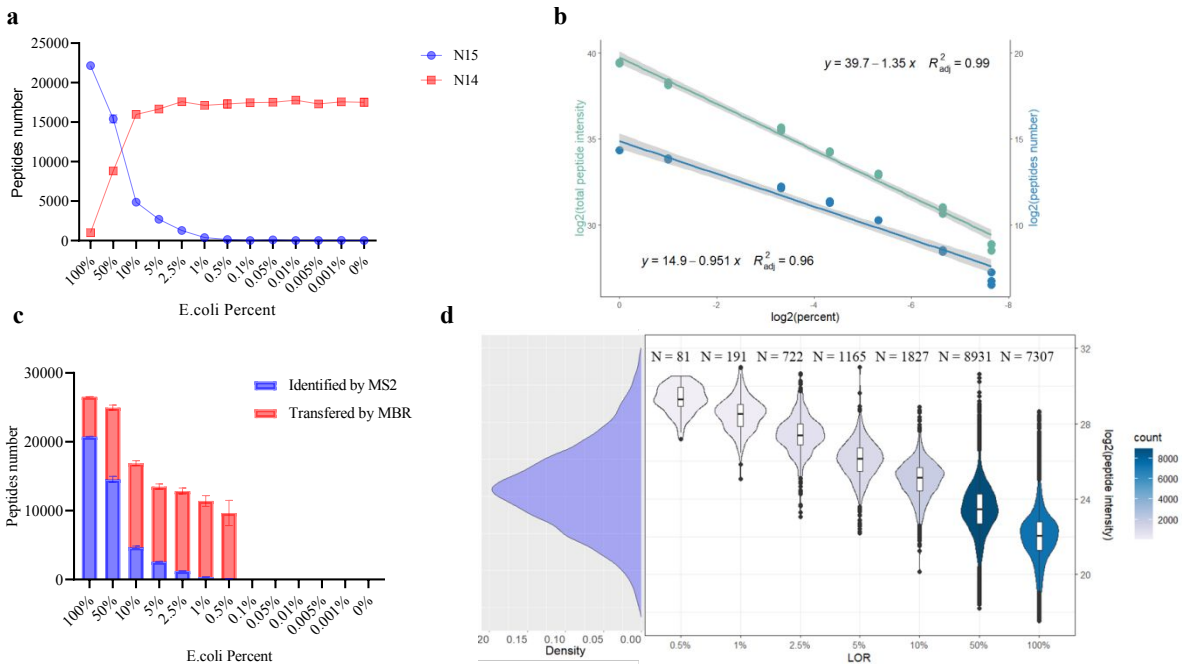

Figure S2. Performance of DDA method on peptide identification and quantification with the cultured protein as background. a. The number of identified peptides in each sample (Stool). b. The number of quantified peptides in each sample. Peptides identified directly by database searching (Pfind 3.0) are shown in red. Peptides transferred by

MBR (FlashLFQ) are shown in blue. c. Linear regression between log<sub>2</sub> quantified peptide number and log<sub>2</sub> percentage (blue). Linear regression between log<sub>2</sub> total peptide intensity and log<sub>2</sub> percentage (green). d. Density plot of all quantified <sup>15</sup>N peptides on peptide intensity (left.). Distribution of LODs on peptide intensity (right). The figures above each LOD group represent the number of peptides in each group, which is also displayed by the color scale.

Figure S3

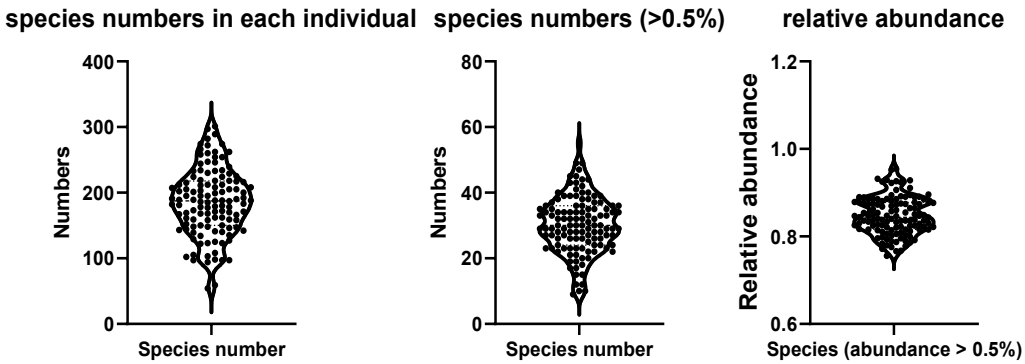

**Figure S3.** Abundance distribution of gut microbiome. a. Species number in each individual. b. The number of the species whose abundance over 0.5%. c. Relative abundance of species whose abundance over 0.5%. The analysis was based on the previous published metagenomic data.

Figure S4

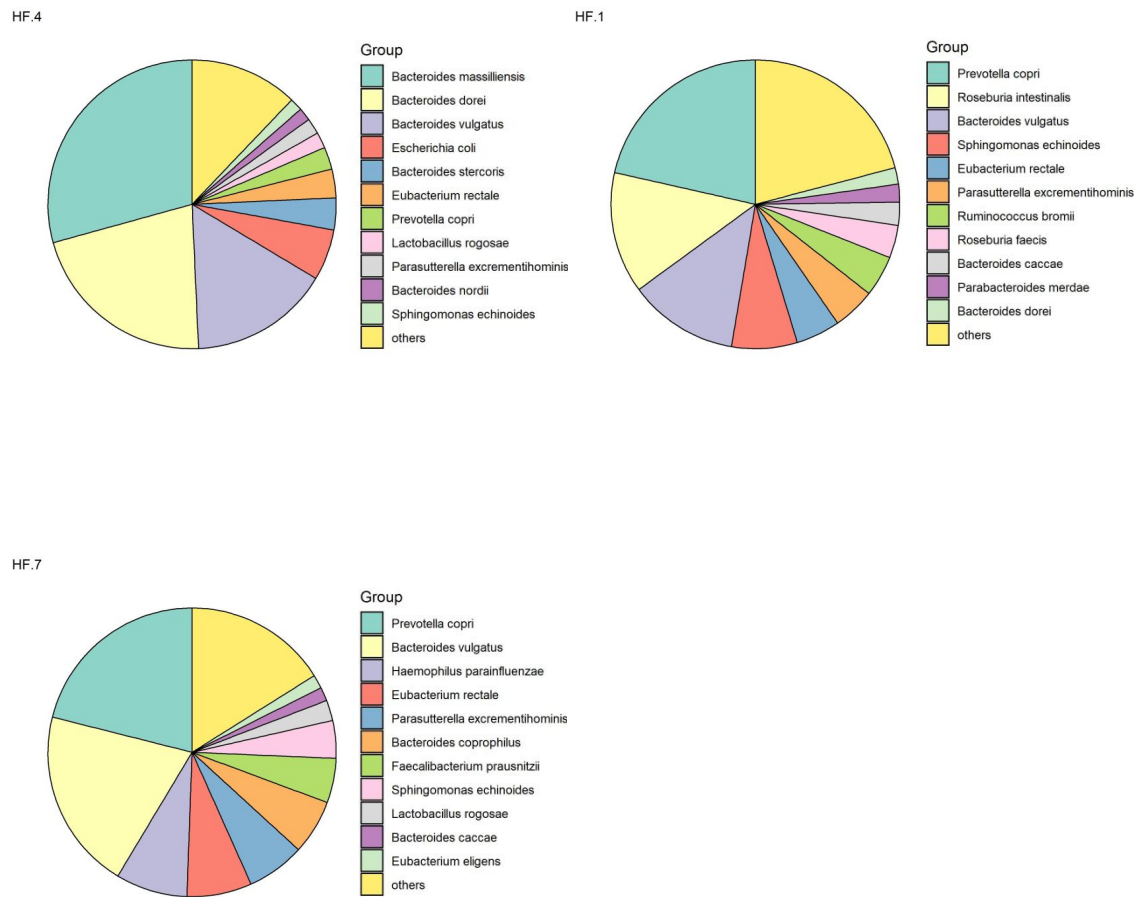

**Figure S4.** The three representative microbiome composition plots are based on the previously published metagenomic data. The pie charts were built by the species-level taxonomies. Sample indexes from original data are shown in the top left corner.

Figure S5

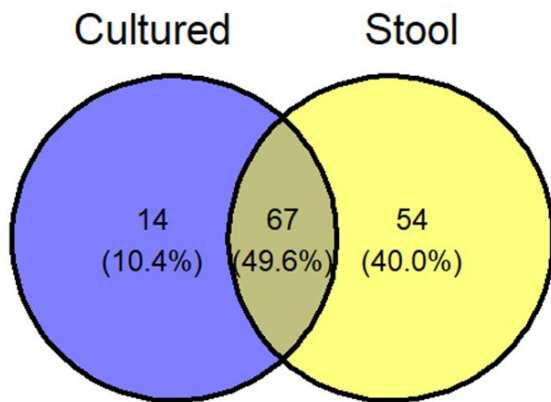

Figure S5. Intersected peptides with LOR at 0.5% between two groups.

Figure S6

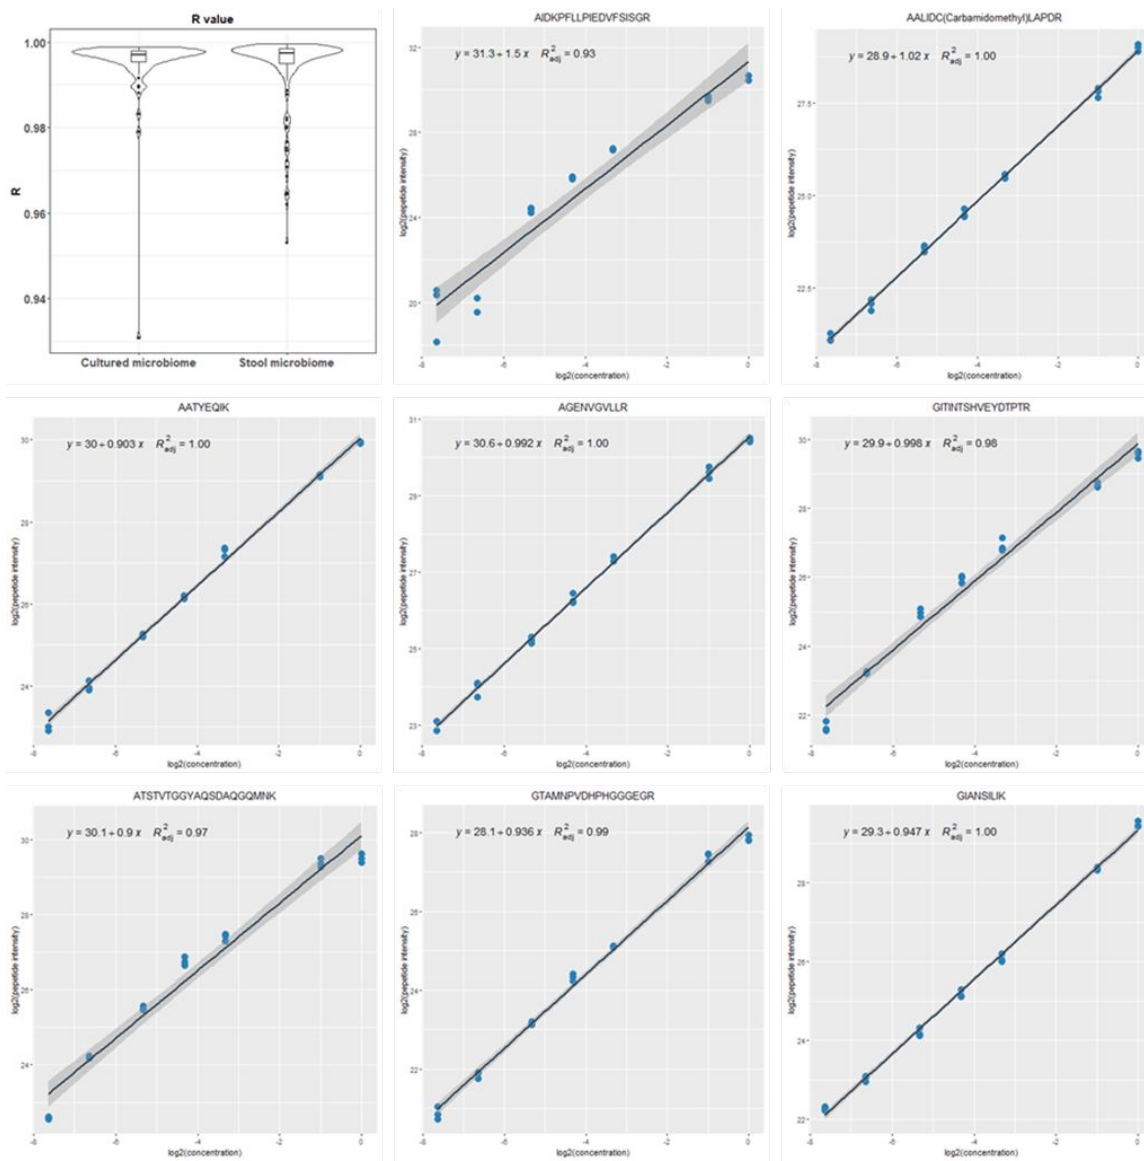

**Figure S6.**  $R^2$  value from robust regression between log2 intensity of peptides whose LORs were at 0.5% and *E. coli* percentage in mixtures (The first figure) and representative linear regression plot when not performing MBR. (The other eight figures, the first four are from the cultured microbiome group; the last four are from the stool microbiome group).

**Figure S7**

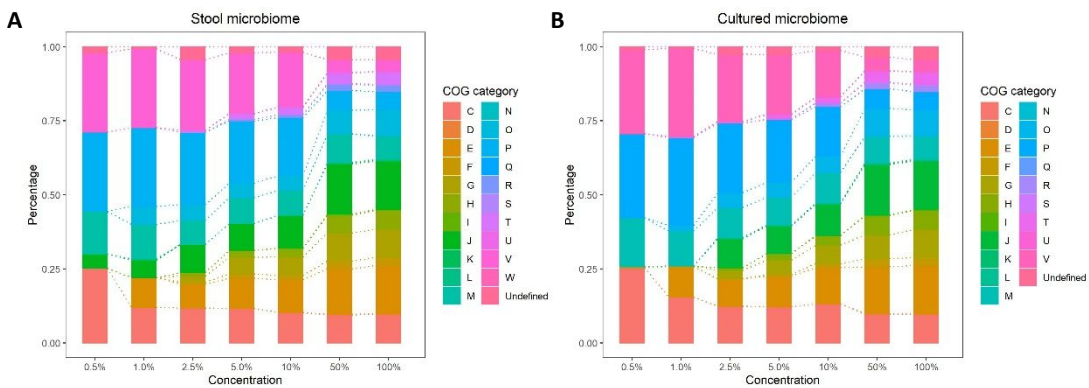

**Figure S7.** Evaluation of taxonomy and function analysis. The COG category composition along with *E. coli* concentration (Stool microbiome: A; Cultured microbiome: B).

**Figure S8**

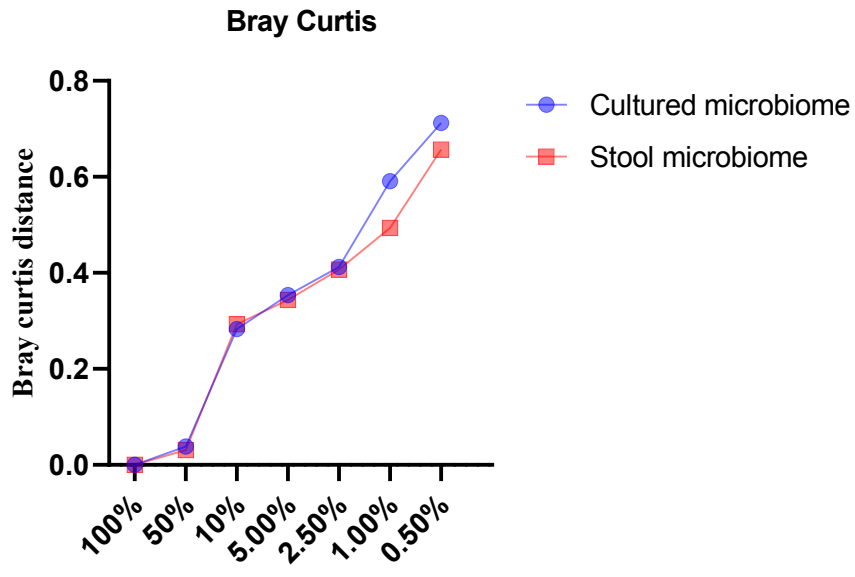

Figure S8. Bray-Curtis distance between each and 100% *E. coli* on COG composition.

Figure S9



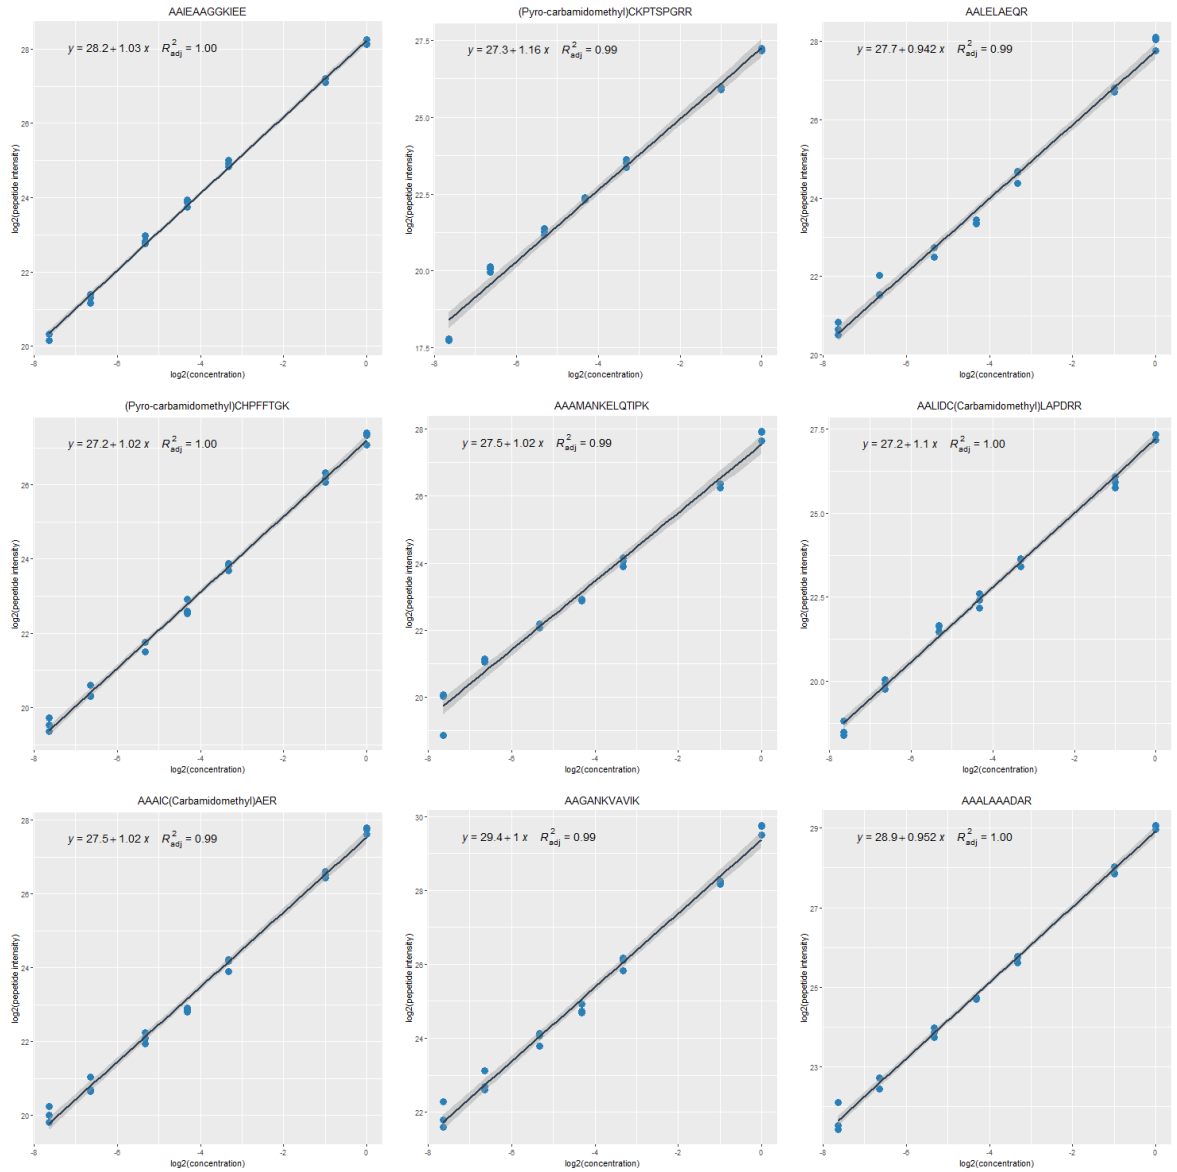

Figure S9. Representative well-fitted linear regression plot from cultured microbiome group when using MBR.

Figure S10

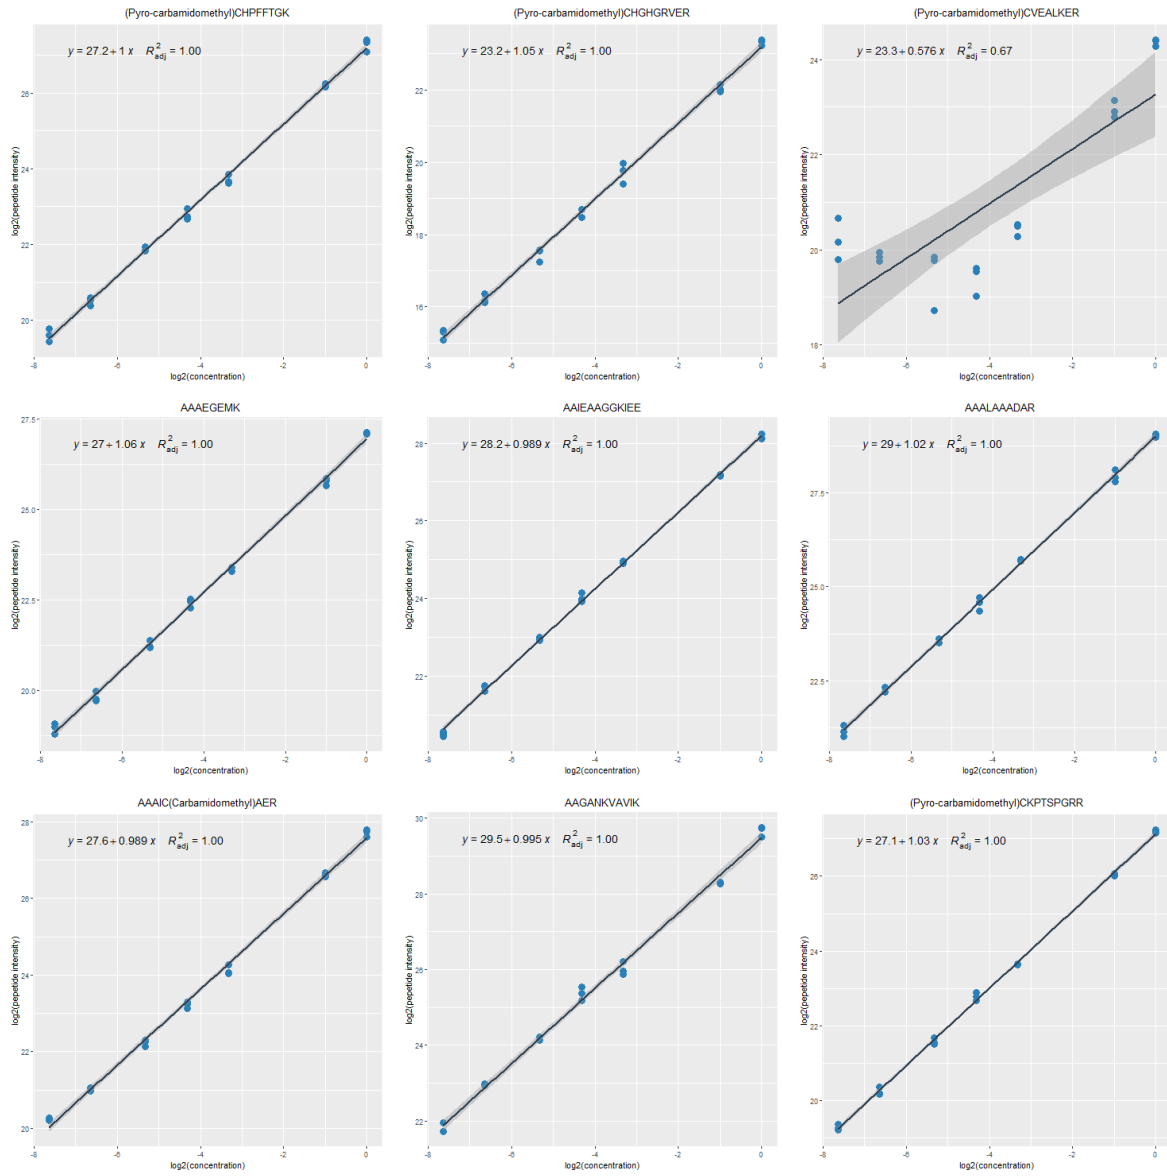

Figure S10. Representative well-fitted linear regression plot from stool microbiome group when using MBR.

Figure S11

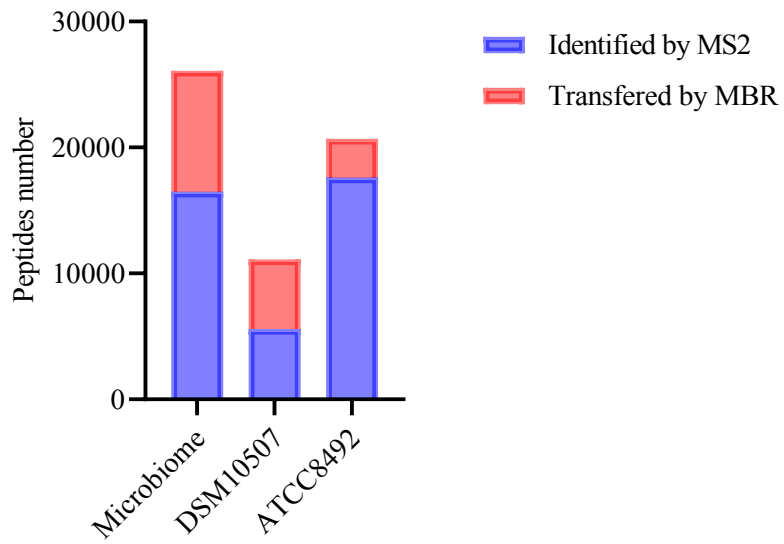

**Figure S11.** The number of quantified peptides. Peptides identified directly by database searching are shown in red. Peptides transferred by MBR are shown in blue.
